# Supplementary material for: ING5 knockdown enhances migration and invasion of lung cancer cells by inducing EMT via EGFR/PI3K/Akt and IL-6/STAT3 signaling pathways
Source: PubMed Central journal article supplement (PMC5589578; doi:10.18632/oncotarget.17346), 2017-04-21
Supplement: oncotarget-08-54265-s001.pdf [file oncotarget-08-54265-s001.pdf]

## ING5 knockdown enhances migration and invasion of lung cancer cells by inducing EMT via EGFR/PI3K/Akt and IL-6/STAT3 signaling pathways

### Supplementary Materials

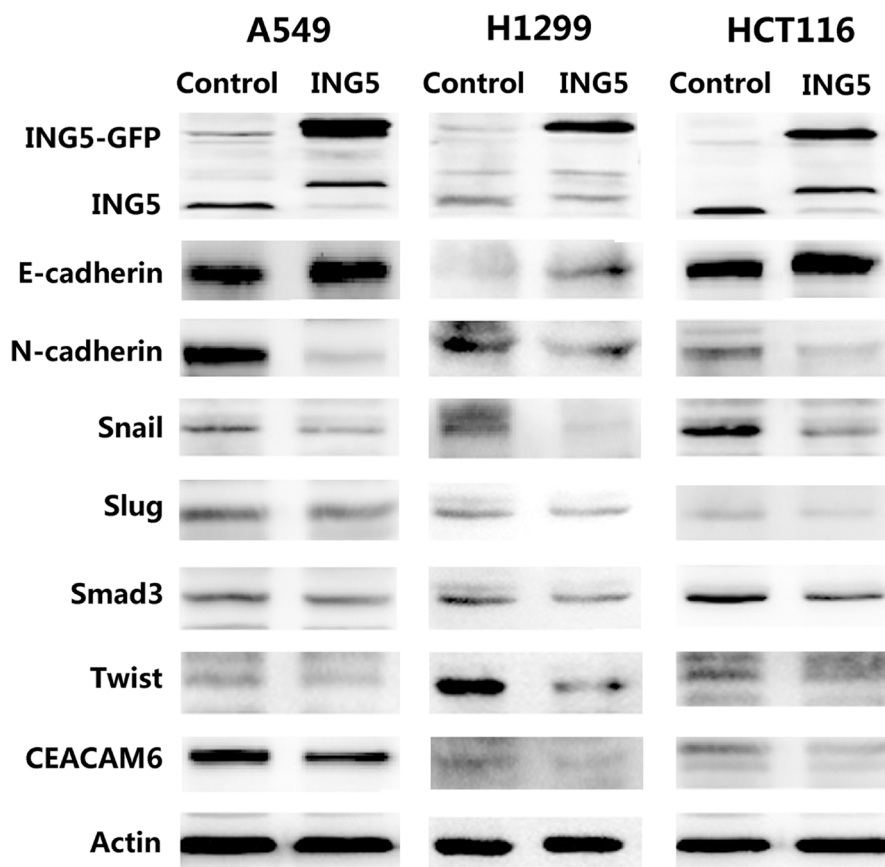

Supplementary Figure 1: Effects of ING5 overexpression on protein level of EMT markers and related proteins in A549, H1299 and HCT116 cells by western blot. Actin was used as an internal loading control.

## Human Phospho-Kinase Array Coordinates

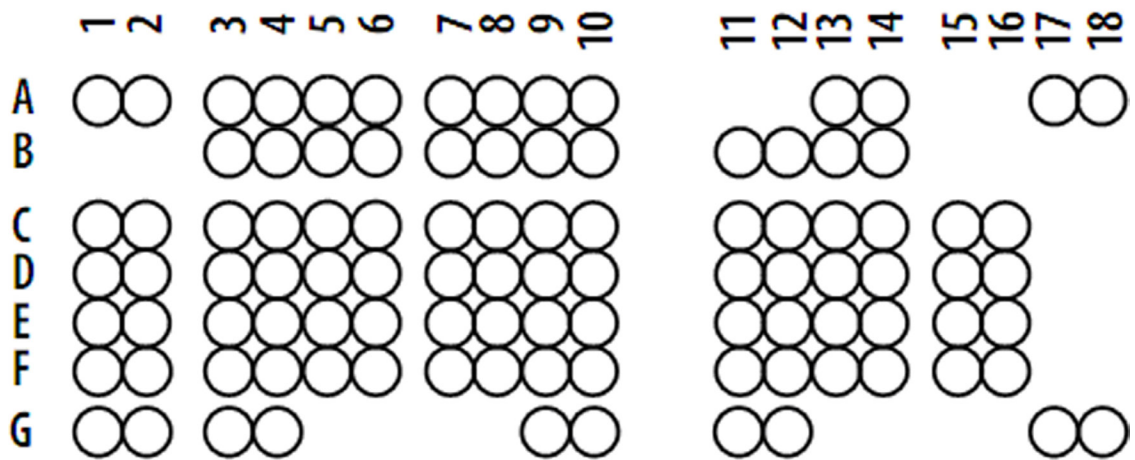

Supplementary Figure 2: Human Phospho-Kinase Array coordinates.

**Supplemental Table 1: Human phosphor-kinase array coordinates and ratio of shING5/shControl**

| Coordinate | Target                 | Phosphorylation site | shING5/shControl |
|------------|------------------------|----------------------|------------------|
| A1, A2     | Reference Spot         |                      | 1                |
| A3, A4     | P38 $\alpha$           | T180/Y182            | 0.89             |
| A5, A6     | ERK1/2                 | T202/Y204, T185/Y187 | 1.66             |
| A7, A8     | JNK1/2/3               | T183/Y185, T221/Y223 | 1.09             |
| A9, A10    | GSK-3 $\alpha/\beta$   | S21/S9               | 1.01             |
| A13, A14   | p53                    | S392                 | 2.12             |
| A17, A18   | Reference Spot         |                      | 1                |
| B3, B4     | EGFR                   | Y1086                | 1.19             |
| B5, B6     | MSK1/2                 | S376/S360            | 1.25             |
| B7, B8     | AMPK $\alpha$ 1        | T183                 | 0.96             |
| B9, B10    | Akt1/2/3               | S473                 | 1.65             |
| B11, B12   | Akt1/2/3               | T308                 | 1.83             |
| B13, B14   | p53                    | S46                  | 1.96             |
| C1, C2     | TOR                    | S2448                | 1.54             |
| C3, C4     | CREB                   | S133                 | 0.80             |
| C5, C6     | HSP27                  | S78/S82              | 1.06             |
| C7, C8     | AMPK $\alpha$ 2        | T172                 | 1.62             |
| C9, C10    | $\beta$ -Catenin       | ***                  | 1.23             |
| C11, C12   | p70 S6 Kinase          | T389                 | 1.13             |
| C13, C14   | p53                    | S15                  | 1.67             |
| C15, C16   | c-Jun                  | S63                  | 1.18             |
| D1, D2     | Src                    | Y419                 | 1.17             |
| D3, D4     | Lyn                    | Y397                 | 1.32             |
| D5, D6     | Lck                    | Y394                 | 1.08             |
| D7, D8     | STAT2                  | Y689                 | 2.36             |
| D9, D10    | STAT5a                 | Y694                 | 1.59             |
| D11, D12   | p70 S6 Kinase          | T421/S424            | 1.63             |
| D13, D14   | RSK1/2/3               | S380/S386/S377       | 1.35             |
| D15, D16   | eNOS                   | S1177                | 1.30             |
| E1, E2     | Fyn                    | Y420                 | 1.21             |
| E3, E4     | Yes                    | Y426                 | 1.08             |
| E5, E6     | Fgr                    | Y412                 | 1.10             |
| E7, E8     | STAT6                  | Y641                 | 1.62             |
| E9, E10    | STAT5b                 | Y699                 | 1.72             |
| E11, E12   | STAT3                  | Y705                 | 1.79             |
| E13, E14   | p27                    | T198                 | 1.16             |
| E15, E16   | PLC- $\gamma$ 1        | Y783                 | 1.34             |
| F1, F2     | Hck                    | Y411                 | 1.28             |
| F3, F4     | Chk-2                  | T68                  | 1.17             |
| F5, F6     | FAK                    | Y397                 | 1.15             |
| F7, F8     | PDGF R $\beta$         | Y751                 | 1.16             |
| F9, F10    | STAT5a/b               | Y694/Y699            | 1.98             |
| F11, F12   | STAT3                  | S727                 | 1.62             |
| F13, F14   | WNK1                   | T60                  | 1.37             |
| F15, F16   | PYK2                   | Y402                 | 1.15             |
| G1, G2     | Reference Spot         |                      |                  |
| G3, G4     | PRAS40                 | T246                 | 2.58             |
| G9, G10    | PBS (Negative Control) |                      |                  |
| G11, G12   | HSP60                  | ***                  | 1.14             |
| G17, G18   | PBS (Negative Control) |                      |                  |

\*\*\*Antibody against total protein was used.
